# Supplementary material for: Basal Transcription Factor 3 Plays an Important Role in Seed Germination and Seedling Growth of Rice
Source: Hindawi journal article supplement (doi:10.1155/2014/465739), 2014-01-01
Supplement: f1 [file 465739.f1.pdf]

**Supplementary Table 1:** List of proteins used for phylogenetic analysis in this study.

| Species                      | Protein name | Accession No. in NCBI |
|------------------------------|--------------|-----------------------|
| <i>Oryza sativa</i>          | Osj3g1BTF3   | NP_001048709          |
|                              | Osj3g2BTF3   | NP_001051911          |
|                              | Osj10gBTF3   | NP_001064883          |
| <i>Sorghum bicolor</i>       | SbBTF3       | EER93008              |
| <i>Arabidopsis thaliana</i>  | AtBTF3       | AEE29647              |
| <i>Nicotiana benthamiana</i> | NbBTF3       | ABE01085              |
| <i>Capsicum annuum</i>       | CaBTF3       | ABM55742              |
| <i>Ricinus communis</i>      | RcBTF3       | EEF34688              |
| <i>Solanum lycopersicum</i>  | SlBTF3       | NP_001234229          |
| <i>Triticum aestivum</i>     | TaBTF3       | AFV31408              |
| <i>Zea mays</i>              | ZmBTF3       | ACG28870              |

**Supplementary Table 2:**List of Q-PCR primers, which were used in the experiment.

| Gene name (Accession No.)      | Primer     | Sequence (5'→3')      |
|--------------------------------|------------|-----------------------|
| Osj10gBTF3<br>(LOC_Os10g34180) | BTF3-10-F  | CTCCTGGTGCTTCTGGT     |
|                                | BTF3-10-R  | GGCAATTCGCAACTTAT     |
| Osj3g1BTF3<br>(LOC_Os03g01910) | BTF3-3-1-F | TTGCTGAGCAGTTCCAGA    |
|                                | BTF3-3-1-R | CTAGGACGACTCTTTCTTCTC |
| Osj3g2BTF3<br>(LOC_Os03g63400) | BTF3-3-2-F | TCCTGGGATCATTAACCAAT  |
|                                | BTF3-3-2-R | TCAGGCTTTTGTCTCCTGAG  |
|                                | UBI-F      | CTGTCAACTGCCGCAAGAAG  |
|                                | UBI-R      | GGCGAGTGACGCTCTAGTTC  |
